# Supplementary material for: Effects of Itraconazole and Diltiazem on the Pharmacokinetics and Pharmacodynamics of Milvexian, A Factor XIa Inhibitor
Source: Springer Nature journal article supplement (doi:10.1007/s40119-022-00266-6), 2022-05-31
Supplement: MOESM1 [file 23112444]

## **Supplementary Material**

### **Effects of Itraconazole and Diltiazem on the Pharmacokinetics and Pharmacodynamics of Milvexian, a Factor XIa Inhibitor**

Vidya Perera,<sup>1,\*</sup> Zhaoqing Wang,<sup>1</sup> Susan Lubin,<sup>1</sup> Lisa J. Christopher,<sup>1</sup> Wei Chen,<sup>1</sup> Sophia Xu,<sup>1</sup>  
Dietmar Seiffert,<sup>1</sup> Mary DeSouza,<sup>1</sup> Bindu Murthy<sup>1</sup>

<sup>1</sup>Bristol Myers Squibb, Princeton, NJ, USA.

\*Corresponding Author: Vidya Perera, Vidya.Perera@bms.com

**Table S1** Period 1 PK and PD sampling schedule

| <b>Study day</b> | <b>Time<br/>(relative to<br/>milvexian dose);<br/>hour:min</b> | <b>PK blood sample<br/>for plasma</b> | <b>PD blood sample</b> |
|------------------|----------------------------------------------------------------|---------------------------------------|------------------------|
| 1                | 00:00                                                          | X                                     | X                      |
| 1                | 00:30                                                          | X                                     |                        |
| 1                | 1:00                                                           | X                                     |                        |
| 1                | 2:00                                                           | X                                     | X                      |
| 1                | 3:00                                                           | X                                     |                        |
| 1                | 4:00                                                           | X                                     |                        |
| 1                | 6:00                                                           | X                                     |                        |
| 1                | 8:00                                                           | X                                     | X                      |
| 1                | 10:00                                                          | X                                     |                        |
| 1                | 12:00                                                          | X                                     |                        |
| 2                | 24:00                                                          | X                                     | X                      |
| 2                | 36:00                                                          | X                                     | X                      |
| 3                | 48:00                                                          | X                                     | X                      |

PK, pharmacokinetic; PD, pharmacodynamic.

**Table S2** Itraconazole sequence PK and PD sampling schedule

| <b>Study day</b> | <b>Time<br/>(relative to<br/>milvexian dose);<br/>hour:min</b> | <b>PK blood sample<br/>for plasma</b> | <b>PD blood sample</b> |
|------------------|----------------------------------------------------------------|---------------------------------------|------------------------|
| 4                | 72:00                                                          | X                                     | X                      |
| 6                | 01:00 <sup>a</sup>                                             |                                       | X                      |
| 7                | 00:00                                                          | X                                     | X                      |
| 7                | 00:30                                                          | X                                     |                        |
| 7                | 01:00                                                          | X                                     |                        |
| 7                | 02:00                                                          | X                                     | X                      |
| 7                | 03:00                                                          | X                                     |                        |
| 7                | 04:00                                                          | X                                     |                        |
| 7                | 06:00                                                          | X                                     |                        |
| 7                | 08:00                                                          | X                                     | X                      |
| 7                | 10:00                                                          | X                                     |                        |
| 7                | 12:00                                                          | X                                     |                        |
| 8                | 24:00                                                          | X                                     | X                      |
| 8                | 36:00                                                          | X                                     | X                      |

|    |        |   |   |
|----|--------|---|---|
| 9  | 48:00  | X | X |
| 10 | 72:00  | X |   |
| 11 | 96:00  | X |   |
| 12 | 120:00 | X |   |

PK, pharmacokinetic; PD, pharmacodynamic.

<sup>a</sup>Sample obtained 1 hour after itraconazole dosing.

**Table S3** Diltiazem sequence PK and PD sampling schedule

| <b>Study day</b> | <b>Time<br/>(relative to<br/>milvexian dose);<br/>hour:min</b> | <b>PK blood sample<br/>for plasma</b> | <b>PD blood sample</b> |
|------------------|----------------------------------------------------------------|---------------------------------------|------------------------|
| 4                | 72:00                                                          | X                                     |                        |
| 10               | 08:00 <sup>a</sup>                                             |                                       | X                      |
| 11               | 00:00                                                          | X                                     | X                      |
| 11               | 00:30                                                          | X                                     |                        |
| 11               | 01:00                                                          | X                                     |                        |
| 11               | 02:00                                                          | X                                     | X                      |
| 11               | 03:00                                                          | X                                     |                        |
| 11               | 04:00                                                          | X                                     |                        |
| 11               | 06:00                                                          | X                                     |                        |
| 11               | 08:00                                                          | X                                     | X                      |
| 11               | 10:00                                                          | X                                     |                        |
| 11               | 12:00                                                          | X                                     |                        |
| 12               | 24:00                                                          | X                                     | X                      |
| 12               | 36:00                                                          | X                                     | X                      |

|    |       |   |   |
|----|-------|---|---|
| 13 | 48:00 | X | X |
| 14 | 72:00 | X |   |
| 15 | 96:00 | X |   |

PK, pharmacokinetic; PD, pharmacodynamic.

<sup>a</sup>Sample obtained 8 hours after diltiazem dosing.

**Fig S1.** Percentage change from baseline in aPTT versus milvexian plasma concentration in the (a) itraconazole and (b) diltiazem sequences

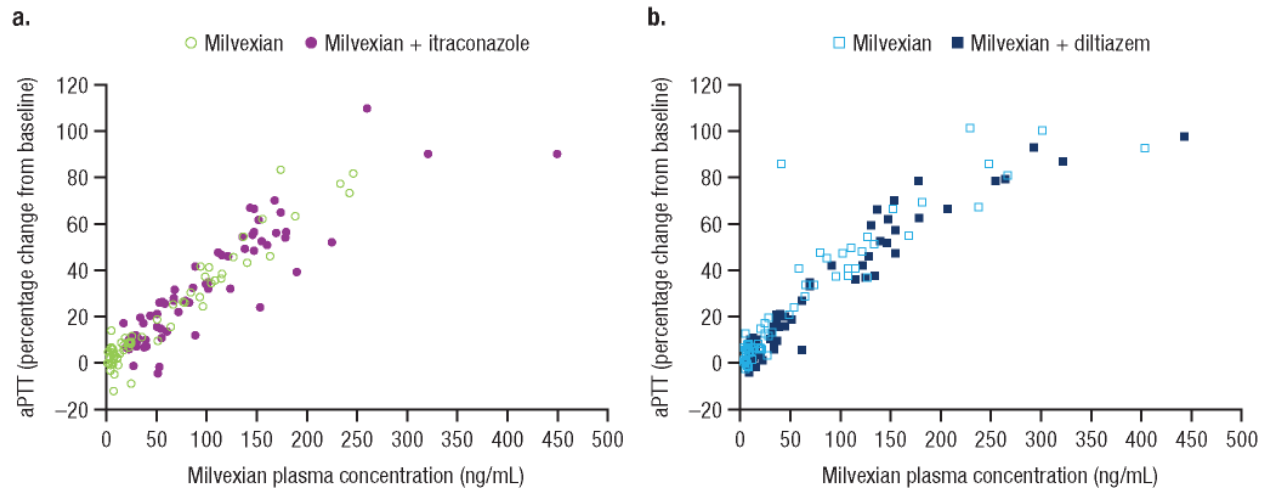

aPTT, activated partial thromboplastin time.
